# Supplementary material for: Anti-Quorum-Sensing Potential of Ethanolic Extracts of Aromatic Plants from the Flora of Cyprus
Source: MDPI journal article supplement (doi:10.3390/plants11192632), 2022-10-07
Supplement: s1 [file s1]

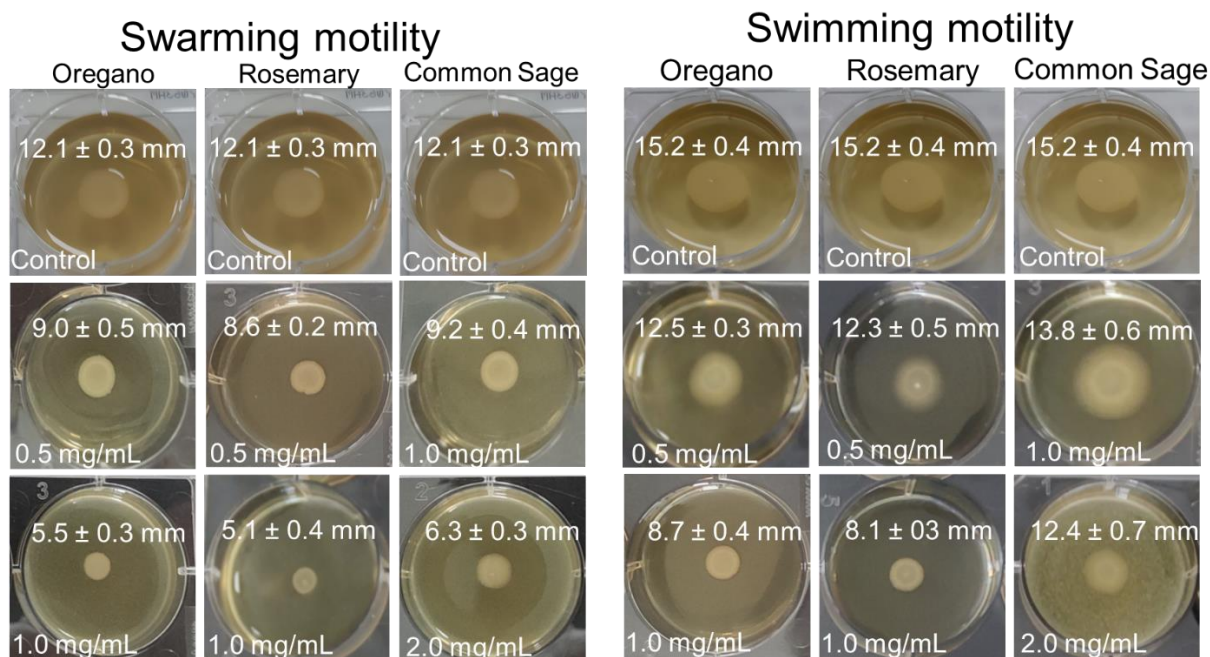

**Figure S1:** Inhibition of swarming and swimming motilities of *E. coli* MG1655 by different concentrations of the ethanolic extracts. *E. coli* MG1655 was grown on LB agar in the absence and in the presence of ethanolic extracts of oregano (at 0.5 mg/mL or 1 mg/mL), rosemary (at 0.5 mg/mL or 1 mg/mL) or common sage (at 1 mg/mL or 2 mg/mL) overnight at 37°C. The next morning the swimming and swarming migrations were recorded by measuring the diameter of swarm fronts or swim zones. Results are presented as mean ± SD, n = 3.

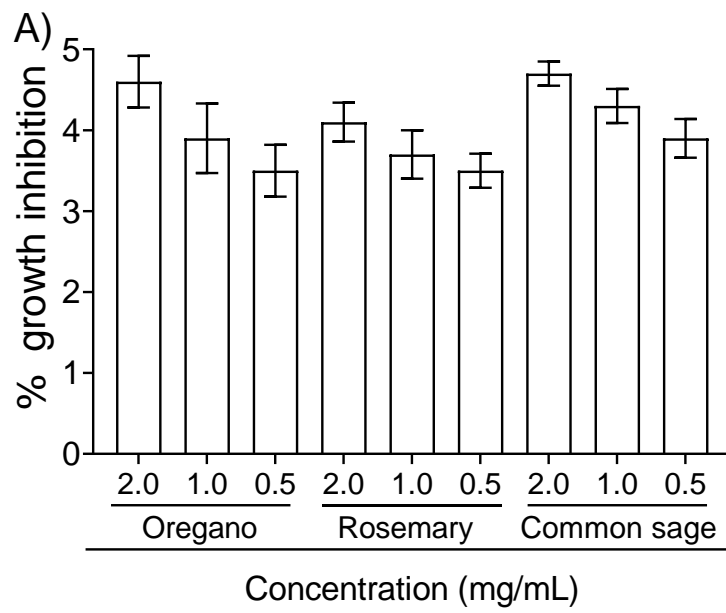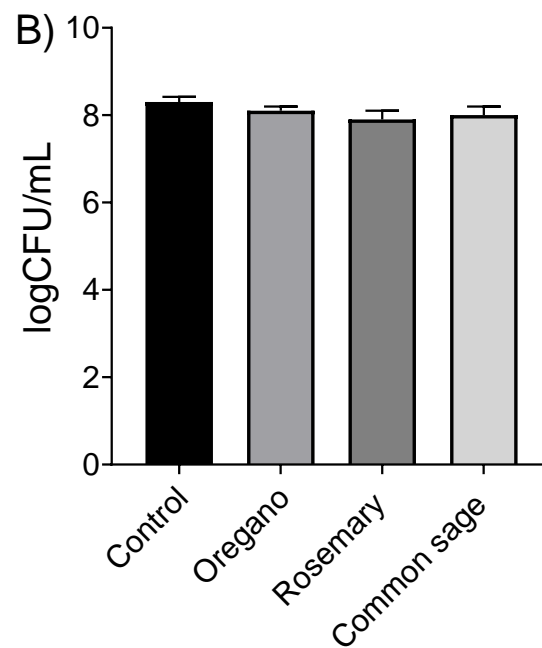

**Figure S2:** Effect of the ethanolic extracts of oregano, rosemary, and common sage on *E. coli* MG1655 growth. **A)** *E. coli* MG1655 was incubated in the absence and presence of different concentration of the extracts in the wells of a 96 well plate (200  $\mu$ L per well) for 20 h. **B)** The effect of ethanolic of the ethanolic extracts (at 1mg/mL for oregano and rosemary and 2 mg/mL for common sage) on bacterial growth was determined using viable plate counts after 24 h of incubation. Results are presented as mean  $\pm$  SD, n = 3.

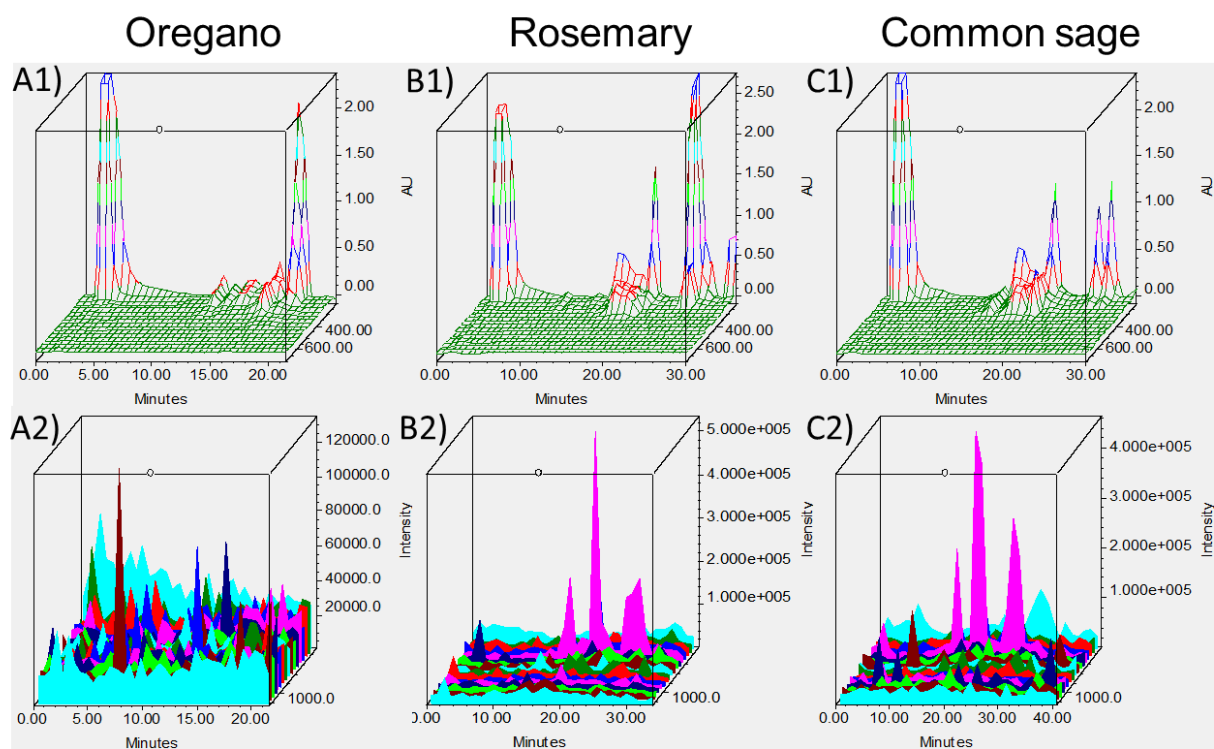

**Figure S3:** 3D-Chromatograms of extracts obtained using PDA data. Data for oregano (A1, A2), rosemary (B1, B2), and common sage (C1, C2) obtained using PDA data at i) PDA UV-Vis, 210-700 nm (top panels) and, ii) MS full scan (bottom panels).

(A)  $m/z=271$  Apigenin

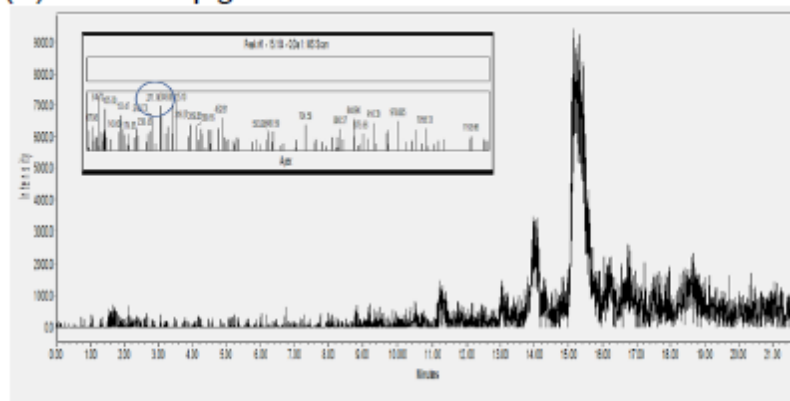

(B)  $m/z=361$  Rosmarinic acid

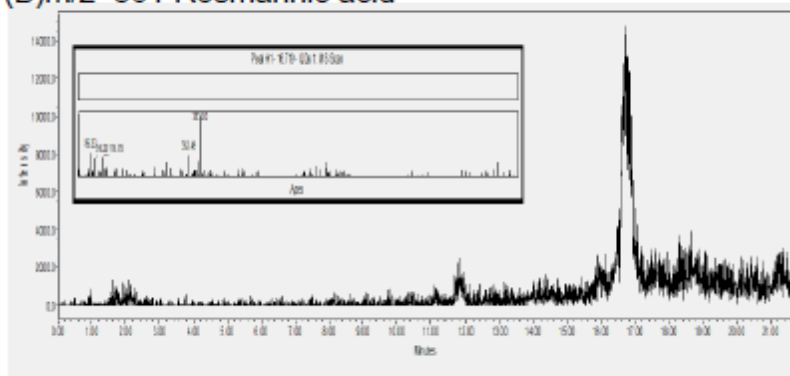

(C)  $m/z=355$  Chlorogenic Acid

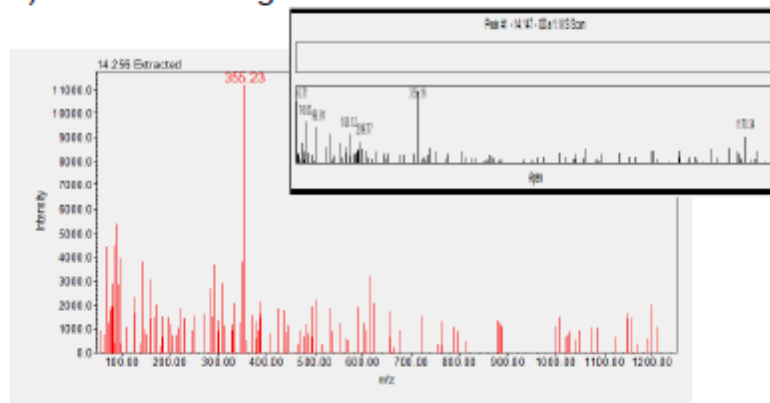

(D)  $m/z=331$  Carnosol

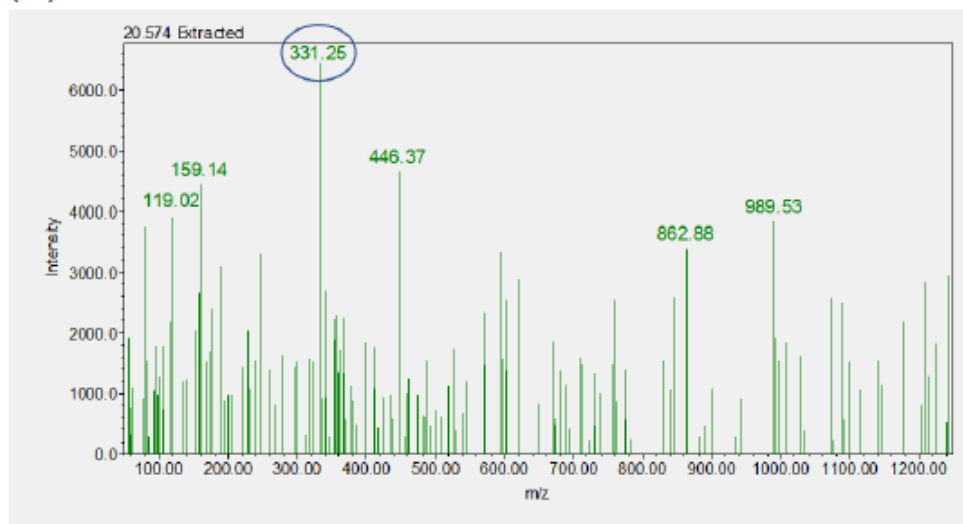

(E)  $m/z=339$  Quercetin

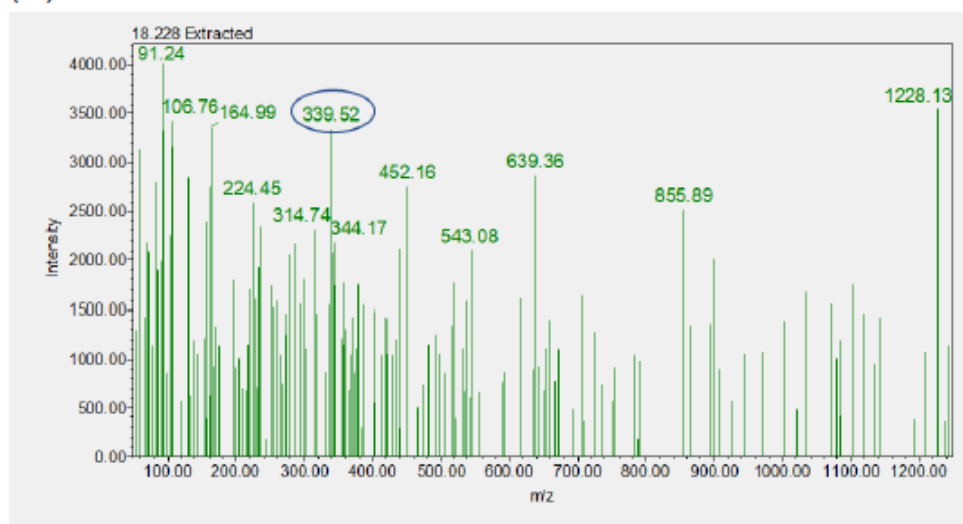

**Figure S4:** Fragment ions at MS for the ethanolic extracts of oregano

A)  $m/z=331$  Carnosol

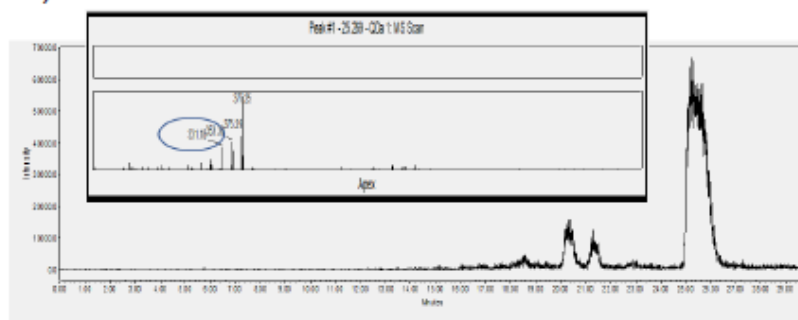

B)  $m/z=353$  Chlorogenic acid

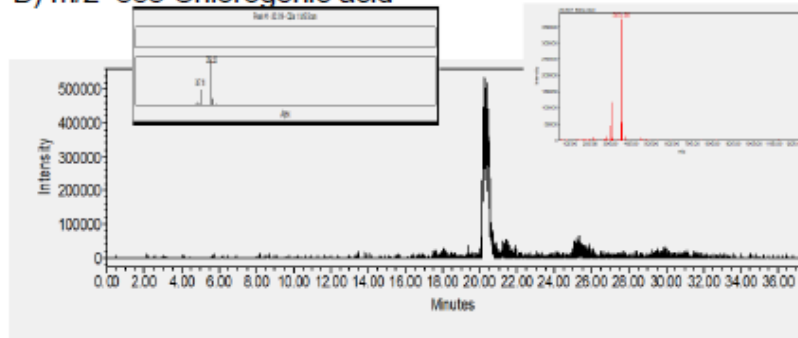

C)  $m/z=339$  Quercetin

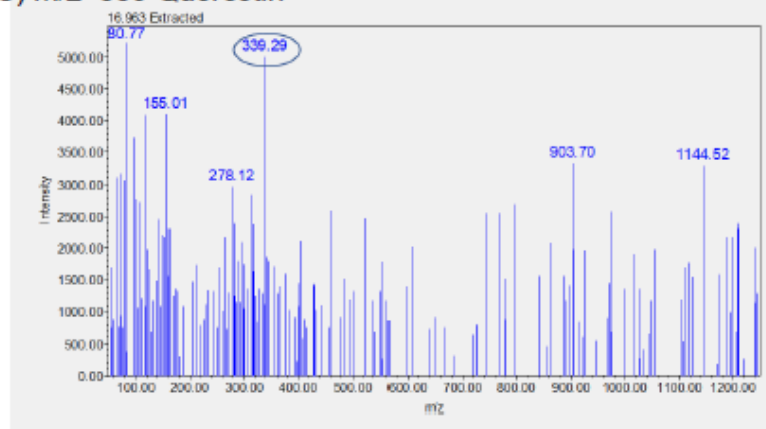

Figure S5: Fragment ions at MS for the ethanolic extracts of rosemary

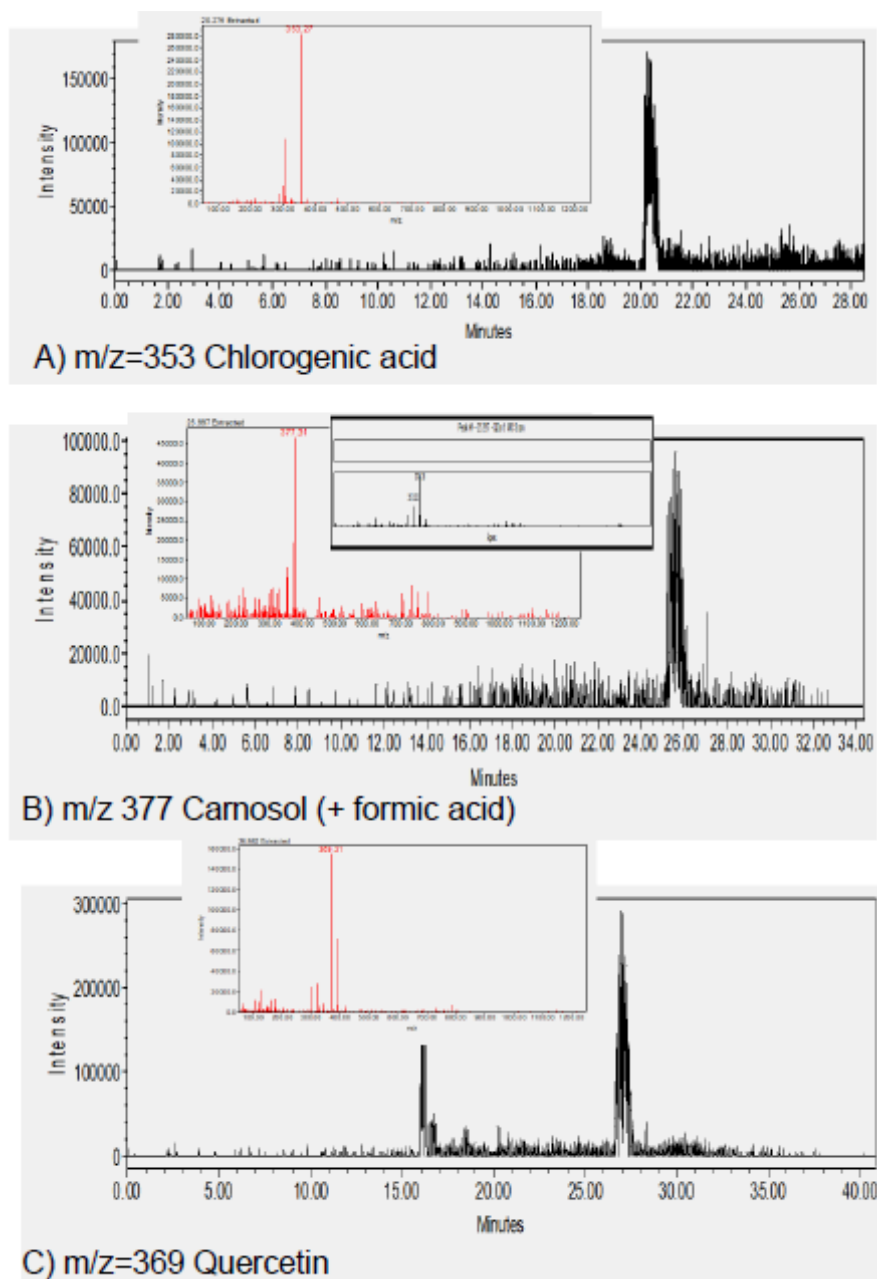

**Figure S6:** Fragment ions at MS for the ethanolic extracts of common sage
